# Supplementary material
Source: PubMed Central journal article supplement (PMC6776984)
Supplement: ao9b01439_si_001.pdf [file ao9b01439_si_001.pdf]

**Structural perturbations due to mutation (H1047R) in phosphoinositide-3-kinase (PI3K $\alpha$ ) and its involvement in oncogenesis: an *in silico* insight**

Jatin Sharma<sup>1,2#</sup>, Vijay Bhardwaj<sup>1,2#</sup> and Rituraj Purohit<sup>\*1,2,3</sup>

<sup>1</sup>Structural Bioinformatics Lab, CSIR-Institute of Himalayan Bioresource Technology (CSIR-IHBT), Palampur, HP, 176061, India

<sup>2</sup>Biotechnology division, CSIR-IHBT, Palampur, HP, 176061, India

<sup>3</sup>Academy of Scientific & Innovative Research (AcSIR), CSIR-IHBT Campus, Palampur, HP, 176061, India

# Equal contribution

\*Author for correspondence ([rituraj@ihbt.res.in](mailto:rituraj@ihbt.res.in))

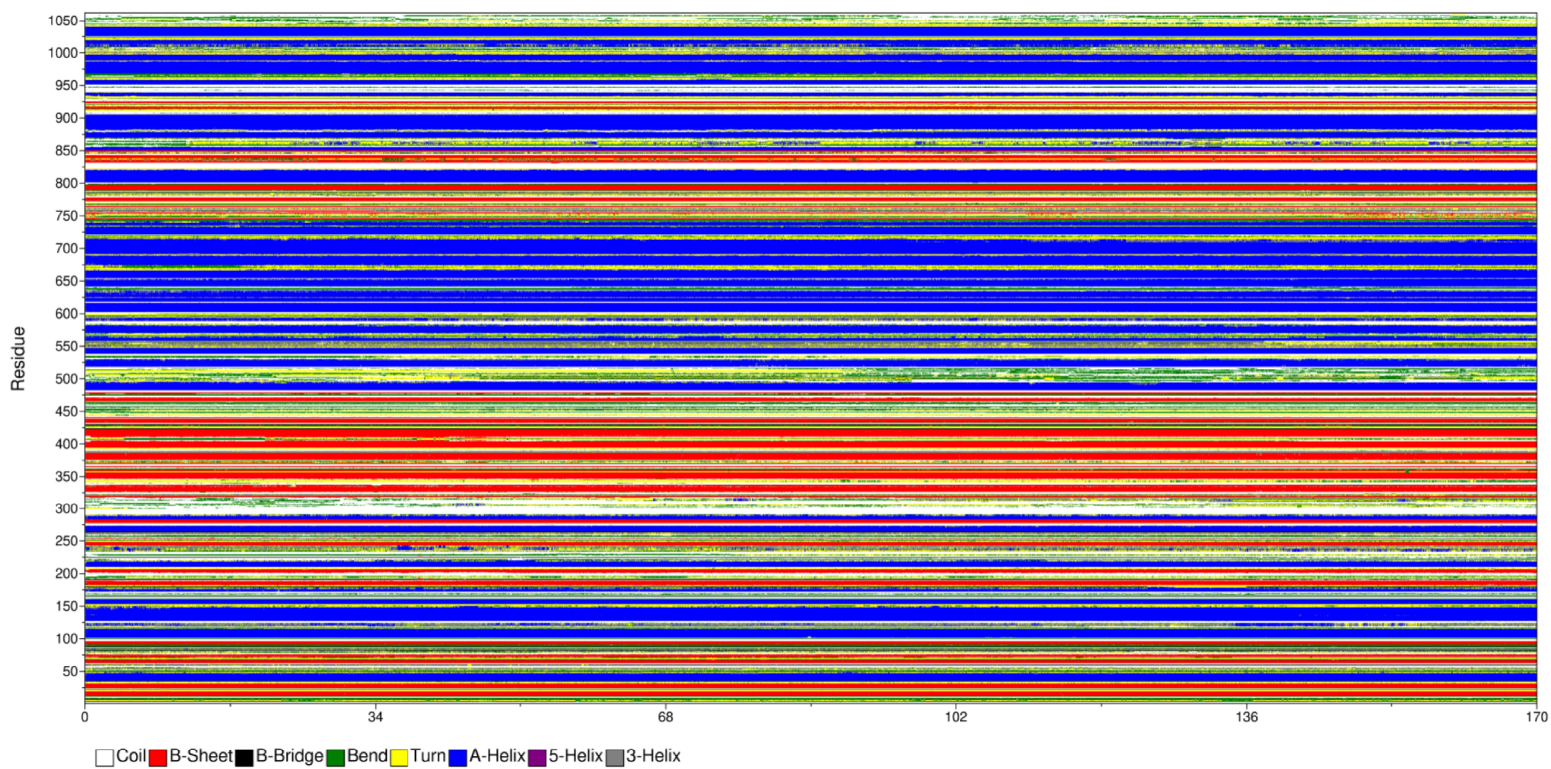

Figure S1. Time evolution of the secondary structural elements of native p110 $\alpha$  protein at 300 k (DSSP classification).

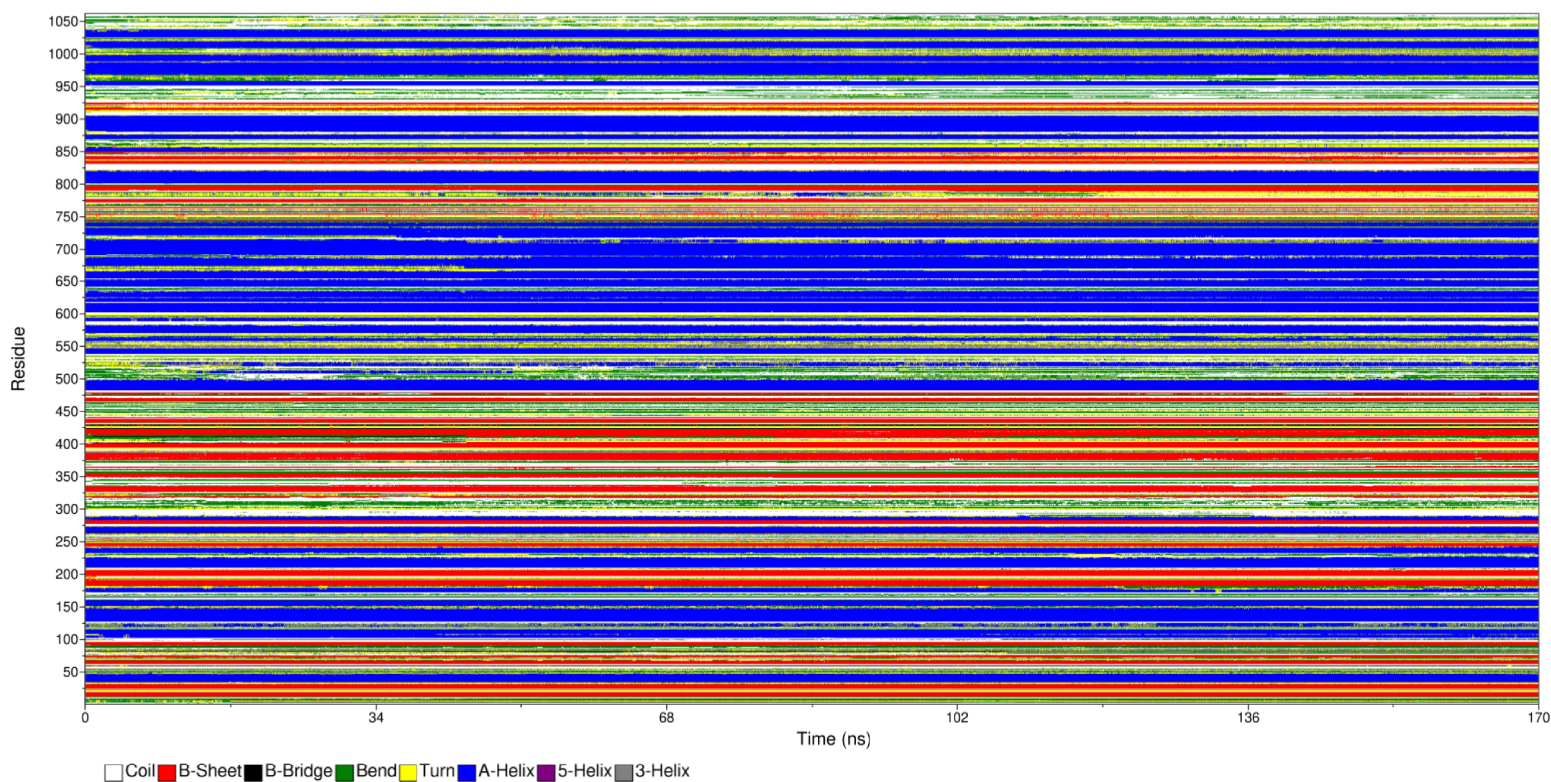

Figure S2. Time evolution of the secondary structural elements of mutant p110 $\alpha$  protein at 300 k (DSSP classification).
